# Supplementary material for: Association between pre-diagnostic dietary antioxidant vitamin consumption and ovarian cancer survival: a prospective cohort study
Source: Royal Society of Chemistry journal article supplement (doi:10.1039/d2fo03213a), 2022-12-20
Supplement: d2fo03213a1.pdf [file d2fo03213a1.pdf]

**Table S1.** Select clinical characteristics and associations with all-cause mortality among women diagnosed with ovarian cancer.

| Characteristics              | No of deaths/total | Adjusted HR <sup>a</sup> (95% CI) |
|------------------------------|--------------------|-----------------------------------|
| <b>Age at diagnosis</b>      |                    |                                   |
| ≤ 50                         | 45/258 (17.44)     | 1.00 (ref)                        |
| > 50                         | 85/445 (19.10)     | 1.24 (0.85-1.79)                  |
| <b>Histological type</b>     |                    |                                   |
| Serous                       | 92/479 (19.21)     | 1.00 (ref)                        |
| Non-serous                   | 38/224 (16.96)     | 1.71 (1.11-2.66)                  |
| <b>Histopathologic grade</b> |                    |                                   |
| Well differentiated          | 5/56 (8.93)        | 1.00 (ref)                        |
| Moderately differentiated    | 7/48 (14.58)       | 1.12 (0.35-3.57)                  |
| Poorly differentiated        | 118/599 (19.70)    | 1.76 (0.70-4.43)                  |
| <b>FIGO stage</b>            |                    |                                   |
| I-II                         | 41/342 (11.99)     | 1.00 (ref)                        |
| III-IV                       | 89/338 (26.33)     | 2.54 (1.65-3.91)                  |
| <b>Residual lesions</b>      |                    |                                   |
| No                           | 82/553 (14.83)     | 1.00 (ref)                        |
| < 1 cm                       | 31/106 (29.25)     | 1.73 (1.11-2.68)                  |
| ≥ 1 cm                       | 17/44 (38.64)      | 2.41 (1.39-4.16)                  |
| <b>Comorbidities</b>         |                    |                                   |
| No                           | 74/393 (18.83)     | 1.00 (ref)                        |
| Yes                          | 56/310 (18.06)     | 0.97 (0.68-1.38)                  |

CI, confidence interval; HR, hazard ratio; Ref, reference.

<sup>a</sup> Mutually adjusted for all other variables listed in the table.

**Table S2.** Selected immunohistochemical biomarkers and associations with overall survival among ovarian cancer patients.

| Characteristics | No. of deaths/total (%) | Adjusted HR * (95% CI) |
|-----------------|-------------------------|------------------------|
| <b>WT-1</b>     |                         |                        |
| Positive        | 59/378 (15.61)          | 1.00 (Ref)             |
| Negative        | 44/190 (23.16)          | 2.42 (1.51-3.87)       |
| <b>ER</b>       |                         |                        |
| Positive        | 81/454 (17.84)          | 1.00 (Ref)             |
| Negative        | 30/129 (23.26)          | 2.09 (1.24-3.52)       |
| <b>PR</b>       |                         |                        |
| Positive        | 50/321 (15.58)          | 1.00 (Ref)             |
| Negative        | 61/262 (23.28)          | 1.60 (1.07-2.38)       |
| <b>Vimentin</b> |                         |                        |
| Positive        | 29/156 (18.59)          | 1.00 (Ref)             |
| Negative        | 65/359 (18.11)          | 0.84 (0.51-1.38)       |
| <b>P53</b>      |                         |                        |
| Positive        | 92/473 (19.45)          | 1.00 (Ref)             |
| Negative        | 27/151 (17.88)          | 0.94 (0.61-1.44)       |

CI, confidence interval; ER, Estrogen Receptor; HR, hazard ratio; PR, Progesterone Receptor; Ref, reference; WT-1, Wilms' tumor-1.

\* Adjusted for age at diagnosis, FIGO stage, histological type, histopathologic grade, residual lesions, and comorbidities.

**Table S3.** Adjusted hazard ratio (HR) and 95% confidence interval (CI) of mortality by the tertiles of dietary antioxidant vitamins intake among ovarian cancer patients: sensitivity analysis among people who had not taken vitamin supplements \*.

| Variables           | Dietary antioxidant vitamins intake |                         |                         | <i>P</i> trend † |
|---------------------|-------------------------------------|-------------------------|-------------------------|------------------|
|                     | I                                   | II                      | III                     |                  |
| Vitamins A (µgRE/d) | 1.00 (Ref)                          | 1.01 (0.63-1.63)        | 0.89 (0.50-1.59)        | 0.73             |
| Retinol (µg/d)      | 1.00 (Ref)                          | 0.87 (0.54-1.42)        | 1.15 (0.71-1.88)        | 0.44             |
| α-carotene (µg/d)   | 1.00 (Ref)                          | 0.85 (0.54-1.36)        | 0.77 (0.46-1.27)        | 0.15             |
| β-carotene (µg/d)   | 1.00 (Ref)                          | 0.80 (0.50-1.26)        | <b>0.52 (0.30-0.90)</b> | <b>&lt; 0.05</b> |
| Vitamins C (mg/d)   | 1.00 (Ref)                          | <b>0.57 (0.35-0.91)</b> | <b>0.40 (0.22-0.73)</b> | <b>&lt; 0.05</b> |
| Vitamins E (mg/d)   | 1.00 (Ref)                          | 1.41 (0.89-2.23)        | 1.04 (0.55-1.97)        | 0.36             |

CI, confidence interval; HR, hazard ratio; Ref, reference.

\* HR and 95% CI were calculated with the use of the Cox proportional hazards regression model with adjustment for age at diagnosis, total energy, diet change, body mass index, education, income, physical activity, alcohol drinking, smoke status, comorbidities, FIGO stage, histological type, histopathologic grade, parity, menopausal status, and residual lesions.

† Test for trend based on variables containing the median value for each tertile.

**Table S4.** Adjusted hazard ratio (HR) and 95% confidence interval (CI) of mortality by the tertiles of dietary antioxidant vitamins intake among ovarian cancer patients: sensitivity analysis excluding people who had survived less than one year of death \*.

| Variables           | Dietary antioxidant vitamins intake |                         |                         | <i>P</i> trend † |
|---------------------|-------------------------------------|-------------------------|-------------------------|------------------|
|                     | I                                   | II                      | III                     |                  |
| Vitamins A (µgRE/d) | 1.00 (Ref)                          | 0.95 (0.55-1.65)        | 0.86 (0.45-1.66)        | 0.65             |
| Retinol (µg/d)      | 1.00 (Ref)                          | 0.77 (0.44-1.37)        | 1.14 (0.66-1.99)        | 0.38             |
| α-carotene (µg/d)   | 1.00 (Ref)                          | 0.71 (0.41-1.23)        | 0.73 (0.41-1.28)        | 0.39             |
| β-carotene (µg/d)   | 1.00 (Ref)                          | <b>0.54 (0.32-0.93)</b> | <b>0.53 (0.29-0.96)</b> | <b>&lt; 0.05</b> |
| Vitamins C (mg/d)   | 1.00 (Ref)                          | <b>0.39 (0.22-0.68)</b> | <b>0.33 (0.17-0.64)</b> | <b>&lt; 0.05</b> |
| Vitamins E (mg/d)   | 1.00 (Ref)                          | 1.16 (0.68-1.98)        | 1.09 (0.53-2.21)        | 0.87             |

CI, confidence interval; HR, hazard ratio; Ref, reference.

\* HR and 95% CI were calculated with the use of the Cox proportional hazards regression model with adjustment for age at diagnosis, total energy, diet change, body mass index, education, income, physical activity, alcohol drinking, smoke status, vitamin supplement use, comorbidities, FIGO stage, histological type, histopathologic grade, parity, menopausal status, and residual lesions.

† Test for trend based on variables containing the median value for each tertile.

**Table S5.** Adjusted hazard ratio (HR) and 95% confidence interval (CI) of mortality by the tertiles of dietary antioxidant vitamins intake among ovarian cancer patients: sensitivity analysis excluding people with dietary change \*.

| Variables           | Dietary antioxidant vitamins intake |                         |                         | <i>P</i> trend † |
|---------------------|-------------------------------------|-------------------------|-------------------------|------------------|
|                     | I                                   | II                      | III                     |                  |
| Vitamins A (µgRE/d) | 1.00 (Ref)                          | 0.89 (0.52-1.51)        | 1.01 (0.55-1.86)        | 0.89             |
| Retinol (µg/d)      | 1.00 (Ref)                          | 0.77 (0.45-1.32)        | 1.12 (0.66-1.90)        | 0.40             |
| α-carotene (µg/d)   | 1.00 (Ref)                          | 0.90 (0.54-1.51)        | 0.72 (0.41-1.25)        | 0.23             |
| β-carotene (µg/d)   | 1.00 (Ref)                          | 0.61 (0.37-1.01)        | <b>0.39 (0.21-0.71)</b> | <b>&lt; 0.05</b> |
| Vitamins C (mg/d)   | 1.00 (Ref)                          | <b>0.56 (0.33-0.94)</b> | <b>0.33 (0.17-0.66)</b> | <b>&lt; 0.05</b> |
| Vitamins E (mg/d)   | 1.00 (Ref)                          | 1.13 (0.68-1.88)        | 1.02 (0.51-2.04)        | 0.98             |

CI, confidence interval; HR, hazard ratio; Ref, reference.

\* HR and 95% CI were calculated with the use of the Cox proportional hazards regression model with adjustment for age at diagnosis, total energy, body mass index, education, income, physical activity, alcohol drinking, smoke status, vitamin supplement use, comorbidities, FIGO stage, histological type, histopathologic grade, parity, menopausal status, and residual lesions.

† Test for trend based on variables containing the median value for each tertile.

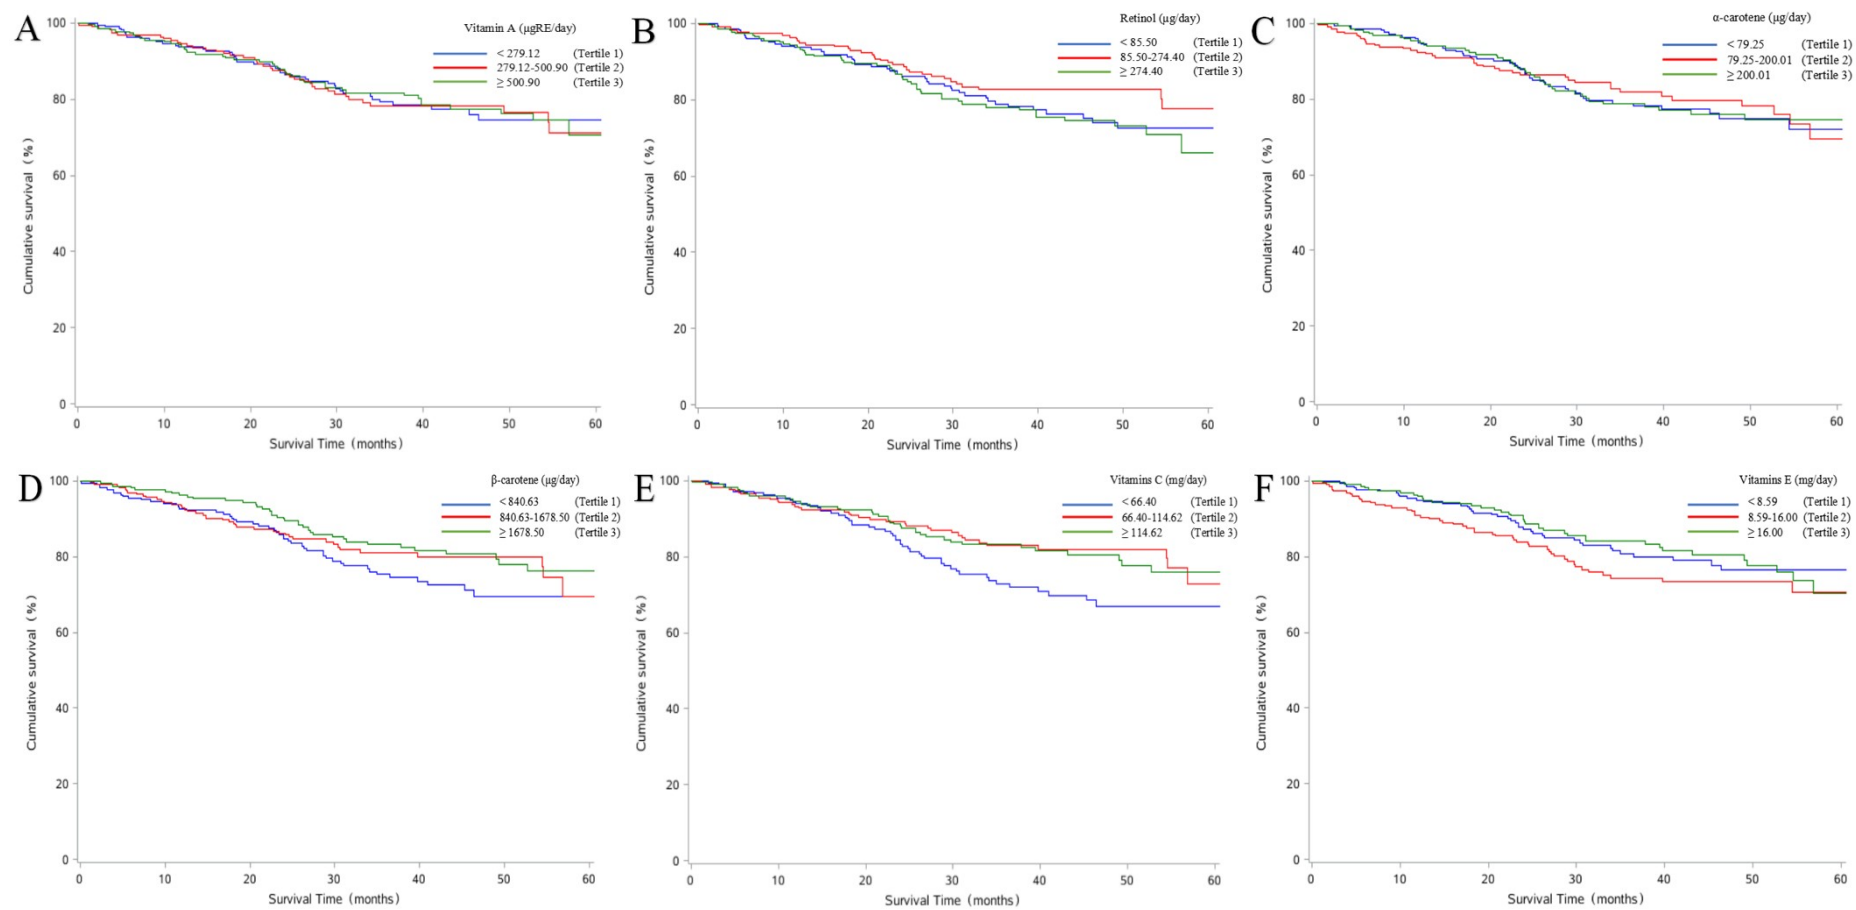

**Figure S1** Kaplan-Meier survival curves for vitamins A (A), retinol (B),  $\alpha$ -carotene (C),  $\beta$ -carotene (D), vitamins C (E), and vitamins E (F).

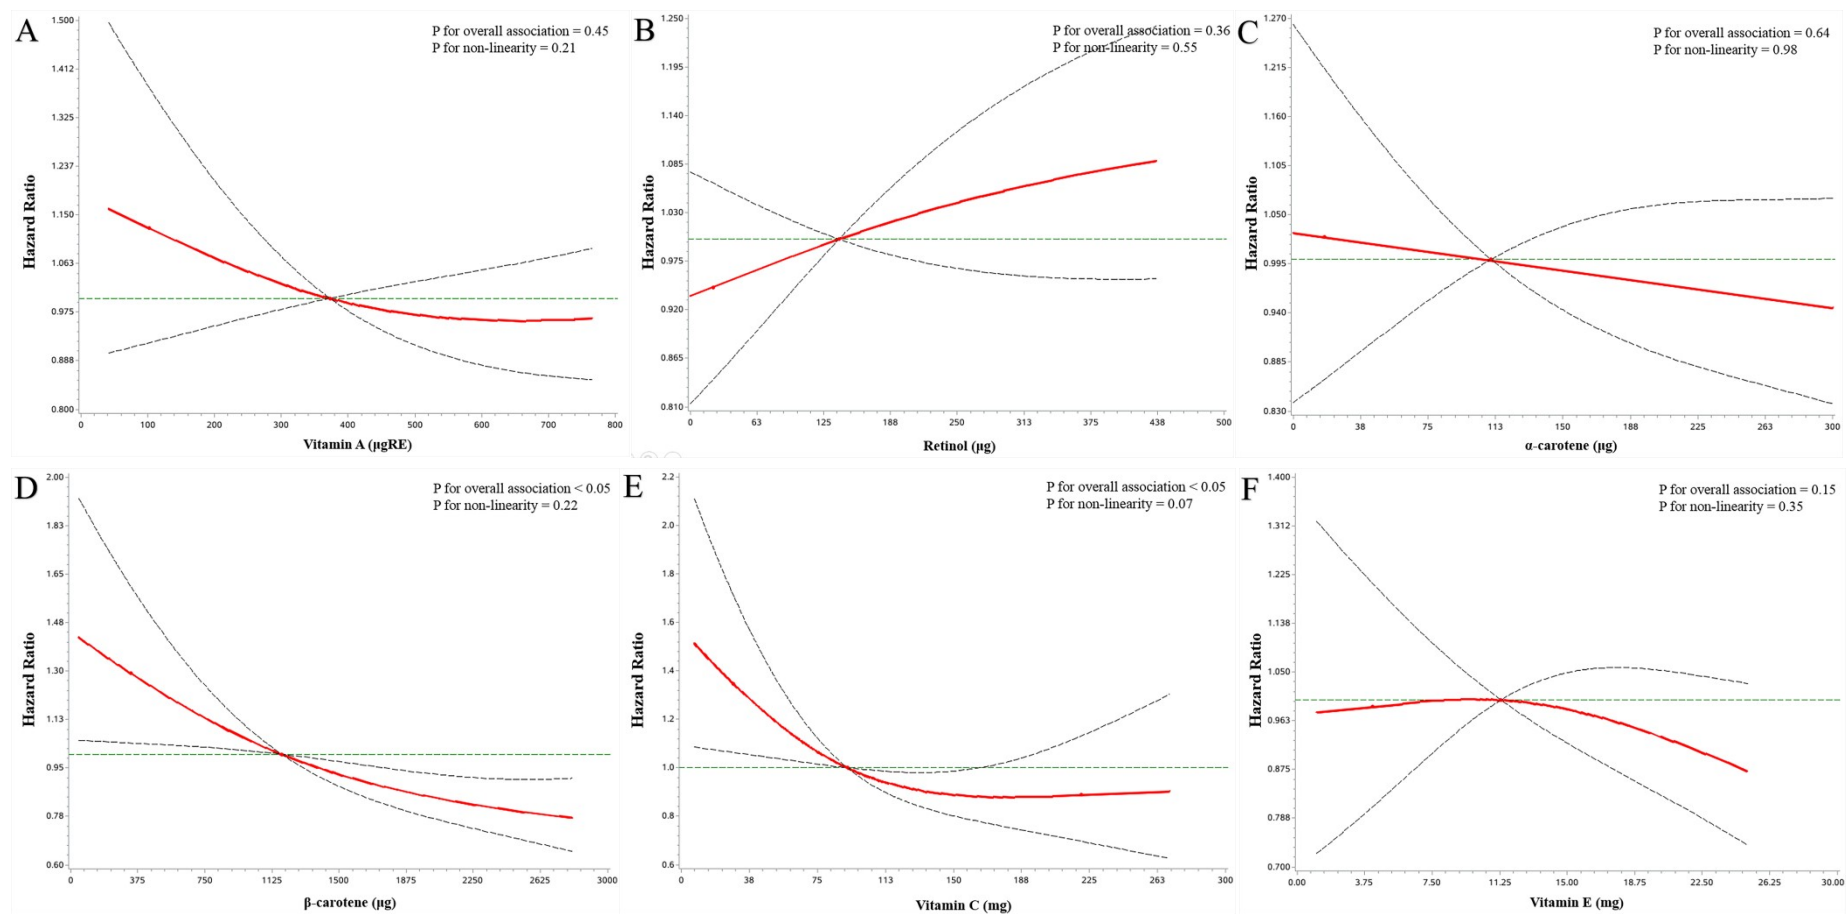

**Figure S2** HR and 95% CI of overall survival among OC patients by vitamin A (A), retinol (B),  $\alpha$ -carotene (C),  $\beta$ -carotene (D), vitamins C (E), and vitamins E (F). The association was adjusted for age at diagnosis, total energy, diet change, body mass index, education, income, physical activity, alcohol drinking, vitamin supplement use, smoke status, comorbidities, FIGO stage, histological type, histopathologic grade, parity, menopausal status, and residual lesions.
